# Supplementary material for: Epstein-Barr viral product-containing exosomes promote fibrosis and nasopharyngeal carcinoma progression through activation of YAP1/FAPα signaling in fibroblasts
Source: PubMed Central journal article supplement (PMC9392321; doi:10.1186/s13046-022-02456-5), 2022-08-20
Supplement: 13046_2022_2456_MOESM1_ESM.pdf [file 13046_2022_2456_MOESM1_ESM.pdf]

**Supplementary Table S1.** Baseline Characteristics of the YAP1 Study Population

| YAP1 Score           | <80                 | ≥80                 | Total               | p value             |
|----------------------|---------------------|---------------------|---------------------|---------------------|
| Number (n=106)       | 55 (51.9%)          | 51 (48.1%)          | 106 (100%)          |                     |
| YAP1 (median)        | 40 (0-70)           | 100 (80-230)        | 70 (0-230)          | <0.001 <sup>a</sup> |
| Mean (± SD)          | 31.59±24.45         | 105.14±38.91        | 71.5±53.11          |                     |
| Age (years) Median   | 47.87 (26.11-68.66) | 48.01 (20.96-81.35) | 47.93 (20.96-81.35) | 0.500 <sup>a</sup>  |
| Mean (± SD)          | 48.44±9.62          | 49.97±13.21         | 49.18±11.47         |                     |
| Total Treatment Days | 54.0 (44-65)        | 53.0 (44-64)        | 53.0 (44-65)        | 0.534 <sup>a</sup>  |
| Mean (± SD)          | 53.89±4.33          | 53.37±4.20          | 53.64±4.26          |                     |
| BED (median)         | 86.4 (79.2-91.2)    | 86.4 (74.3-91.2)    | 86.4 (74.34-91.2)   | 0.275 <sup>a</sup>  |
| Mean (± SD)          | 85.35±2.87          | 86.02±3.36          | 85.68±3.12          |                     |
| Gender               |                     |                     |                     | 0.280 <sup>b</sup>  |
| Female               | 12 (21.8%)          | 16 (31.4%)          | 28 (26.4%)          |                     |
| Male                 | 43 (78.2%)          | 35 (68.6%)          | 78 (73.6%)          |                     |
| Age                  |                     |                     |                     | 0.846 <sup>b</sup>  |
| <48                  | 29 (52.7%)          | 25 (49.0%)          | 54 (50.9%)          |                     |
| ≥48                  | 26 (47.3%)          | 26 (51.0%)          | 52 (49.1%)          |                     |
| AJCC 2010 T-Stage    |                     |                     |                     | 1 <sup>b</sup>      |
| T <sub>1/2</sub>     | 28 (50.9%)          | 25 (49.0%)          | 53 (50%)            |                     |
| T <sub>3/4</sub>     | 27 (49.1%)          | 26 (51.0%)          | 53 (50%)            |                     |
| AJCC 2010 N-Stage    |                     |                     |                     | 0.443 <sup>b</sup>  |
| N <sub>0/1</sub>     | 27 (49.1%)          | 29 (56.9%)          | 56 (52.8%)          |                     |
| N <sub>2/3</sub>     | 28 (50.9%)          | 22 (43.1%)          | 50 (47.2%)          |                     |
| Chemotherapy         |                     |                     |                     | 1 <sup>b</sup>      |
| Yes                  | 42 (76.4%)          | 38 (74.5%)          | 80 (75.5%)          |                     |
| No                   | 13 (23.6%)          | 13 (25.5%)          | 26 (24.5%)          |                     |
| Comorbidity          |                     |                     |                     | 1 <sup>b</sup>      |
| No                   | 34 (61.8%)          | 32 (62.7%)          | 66 (62.3%)          |                     |
| Yes                  | 21 (38.2%)          | 19 (37.3%)          | 40 (37.7%)          |                     |
| Smoking              |                     |                     |                     | 1 <sup>b</sup>      |
| No                   | 25 (45.5%)          | 23 (45.1%)          | 48 (45.3%)          |                     |
| Yes                  | 30 (54.5%)          | 28 (54.9%)          | 58 (54.7%)          |                     |
| Betel Quid           |                     |                     |                     | 0.633 <sup>b</sup>  |
| No                   | 45 (81.8%)          | 39 (76.5%)          | 84 (79.2%)          |                     |
| Yes                  | 10 (18.2%)          | 12 (23.5%)          | 22 (20.8%)          |                     |
| Alcohol              |                     |                     |                     | 0.423 <sup>b</sup>  |
| No                   | 37 (67.3%)          | 30 (58.8%)          | 67 (63.2%)          |                     |
| Yes                  | 18 (32.7%)          | 21 (41.2%)          | 39 (36.8%)          |                     |
| OS (years) Median    | 10.74 (0.16-18.24)  | 10.05 (0.42-16.01)  | 10.41 (0.16-18.24)  | 0.058 <sup>a</sup>  |
| Mean (± SD)          | 10.06±4.62          | 8.32±4.69           | 9.22±4.71           |                     |

<sup>a</sup>p-value was calculated using ANOVA test, 2-tailed. <sup>b</sup>Obtained using chi-square test, 2-tailed.

BED: biologically effective dose; OS: overall survival.
