# Supplementary material for: Epstein-Barr viral product-containing exosomes promote fibrosis and nasopharyngeal carcinoma progression through activation of YAP1/FAPα signaling in fibroblasts
Source: PubMed Central journal article supplement (PMC9392321; doi:10.1186/s13046-022-02456-5), 2022-08-20
Supplement: 13046_2022_2456_MOESM3_ESM.pdf [file 13046_2022_2456_MOESM3_ESM.pdf]

**Supplementary Table S3.** Primer information for quantitative RT-PCR analysis

| <b>Gene Symbol</b> | <b>Gene Product</b>                                                          | <b>Forward primer sequence (5'-3')</b> | <b>Reverse Primer sequence (5'-3')</b> |
|--------------------|------------------------------------------------------------------------------|----------------------------------------|----------------------------------------|
| CCL2               | C-C motif chemokine ligand 2                                                 | CTGAGACTAACCCAGAAACATC                 | GAATGAAGGTGGCTGCTAT                    |
| COL1A1             | Collagen type I alpha 1 chain                                                | CCTGGAAAGAATGGAGATGAT                  | CCACTGAAACCTCTGTGTC                    |
| CSF1               | Colony stimulating factor 1                                                  | GAATGCTCCAGCCAAGA                      | AGAGTCCCTCCAGGTCAA                     |
| CTGF               | Connective tissue growth factor; Cellular communication network factor 2     | AAGAGAACATTAAGAAGGGCAA                 | TCCACAGAATTTAGCTCGGTA                  |
| CYR61              | Cysteine-rich angiogenic inducer 61; Cellular communication network factor 1 | GAATGGAGCCTCGCATC                      | CACAGGTCTTTGAGCACT                     |
| FAP $\alpha$       | Fibroblast activation protein alpha; Prolyl endopeptidase FAP                | CGTGGGTTACTGATGAACGA                   | TCCTGGGTCTTTGGACAAT                    |
| FGF2               | Fibroblast growth factor 2                                                   | GCAGAAGAGAGAGGAGTTG                    | TCATCCGTAACACATTTAGAAGC                |
| FN1                | Fibronectin 1                                                                | GATTCAGAGACTGGGACG                     | CTTGGATAGGTCTGTAAAGGT                  |
| GAPDH              | Glyceraldehyde-3-phosphate dehydrogenase                                     | TCCTCTGACTTCAACAGCGA                   | TCCTTGGAGGCCATGTG                      |
| IGF1               | Insulin like growth factor 1                                                 | CCTTTCAAGCCACCCAT                      | AGTGTGTTTAGCAGCGG                      |
| IGF1R              | Insulin-like growth factor 1 receptor                                        | ATGCTTCAGAAACACCTCAATA                 | TGGATAGATGATGCCTTGGTA                  |
| IGFBP3             | Insulin-like growth factor-binding protein 3                                 | TAAGTATGGGCAGCCTCTC                    | ATGTCCTTGGCAGTCTTT                     |
| IL1A               | Interleukin-1 alpha                                                          | CACGGCACTAAGAACTATTT                   | TGAGACTCCAGACCTACG                     |
| IL1R1              | Interleukin-1 receptor type 1                                                | ACGGTCACCTTCATCTAAACA                  | CATAAGACAGGAGGCACCTA                   |
| IL4R               | Interleukin 4 receptor                                                       | CAGAGAGCATCAGCGTG                      | TCCCTCCTGGAAGTCAT                      |
| IL6                | Interleukin 6                                                                | GTACCTCCAGAACAGATTTGAGA                | TGGCATTGTGGTTGGG                       |
| IL8                | Interleukin 8                                                                | CCAAGAATCAGTGAAGATGC                   | GCAACCTACAACAGACC                      |
| LAMA1              | Laminin subunit alpha 1                                                      | CCACTGTGCTCTGTGATG                     | CACTGAGGTAGACTGGGT                     |
| PDGFA              | Platelet derived growth factor subunit A                                     | GATGAGATGGAGGGTTCGC                    | CTCTGGAGTCGTTCCCAA                     |
| PDGFB              | Platelet derived growth factor subunit B                                     | ACAAGACGGCACTGAAG                      | GAGACAGACGGACGAGG                      |
| PDGFRA             | Platelet derived growth factor receptor alpha                                | GATGAGATGGAGGGTTCGC                    | CTCTGGAGTCGTTCCCAA                     |
| PPIA               | Peptidylprolyl isomerase A                                                   | TGCTGACTGTGGACAAC                      | AGGATACTGCGAGCAAAT                     |
| RARRES2            | Retinoic acid receptor responder 2                                           | GAGTGCGAACTGACTGAT                     | GTGAAGGAGCCTGGAAATG                    |
| SMAD3              | SMAD family member 3                                                         | CTCTCCAATGTCAACAGGAAT                  | CTGAGGCACTCTGCGAA                      |
| VEGFA              | Vascular endothelial growth factor A                                         | GGCTCTGACCAGGAGTT                      | CTGAATCTTCCAGGCAGTG                    |
| VEGFR              | Vascular endothelial growth factor receptor 1                                | GTGTCAGAATCCCTGCGA                     | TGTCTCTTTCACTCACTTCCATA                |
| YAP1               | Yes-associated protein 1                                                     | AGCTTCCTTTGTCCAGTG                     | CAGTCTTCAGCCTTGGTT                     |
