# Supplementary material for: Epstein-Barr viral product-containing exosomes promote fibrosis and nasopharyngeal carcinoma progression through activation of YAP1/FAPα signaling in fibroblasts
Source: PubMed Central journal article supplement (PMC9392321; doi:10.1186/s13046-022-02456-5), 2022-08-20
Supplement: 13046_2022_2456_MOESM4_ESM.pdf [file 13046_2022_2456_MOESM4_ESM.pdf]

# Supplementary Figure S1

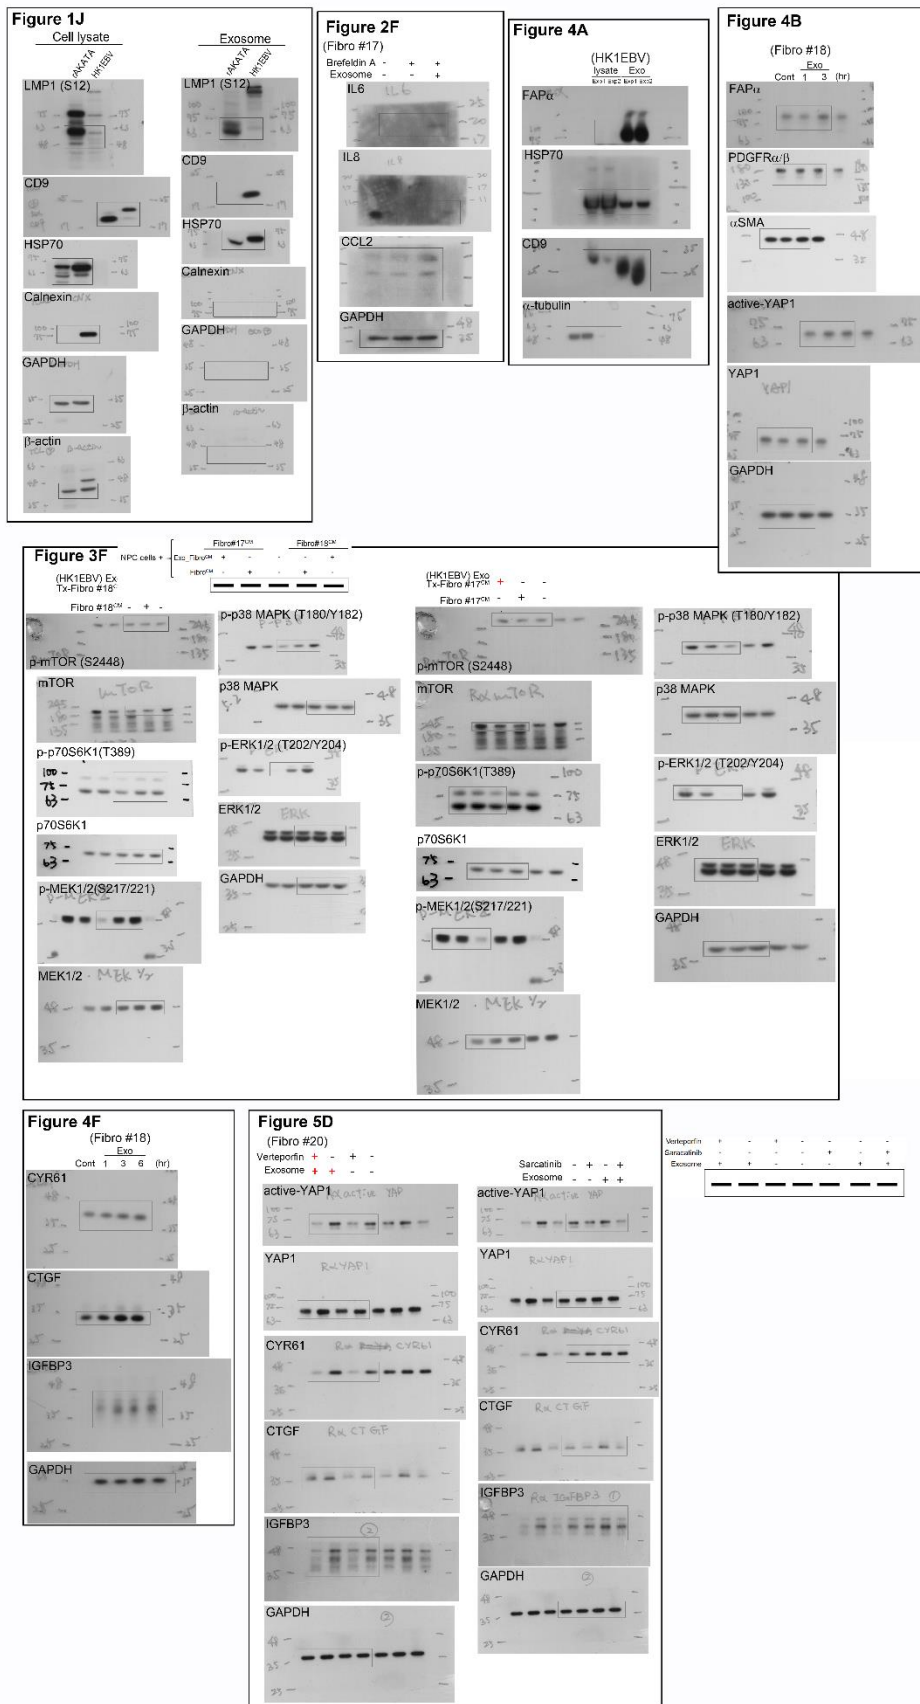

Supplementary Figure S1. Uncropped western blots for figures.
