# Supplementary material for: Epstein-Barr viral product-containing exosomes promote fibrosis and nasopharyngeal carcinoma progression through activation of YAP1/FAPα signaling in fibroblasts
Source: PubMed Central journal article supplement (PMC9392321; doi:10.1186/s13046-022-02456-5), 2022-08-20
Supplement: 13046_2022_2456_MOESM5_ESM.pdf [file 13046_2022_2456_MOESM5_ESM.pdf]

**Supplementary Figure S2**

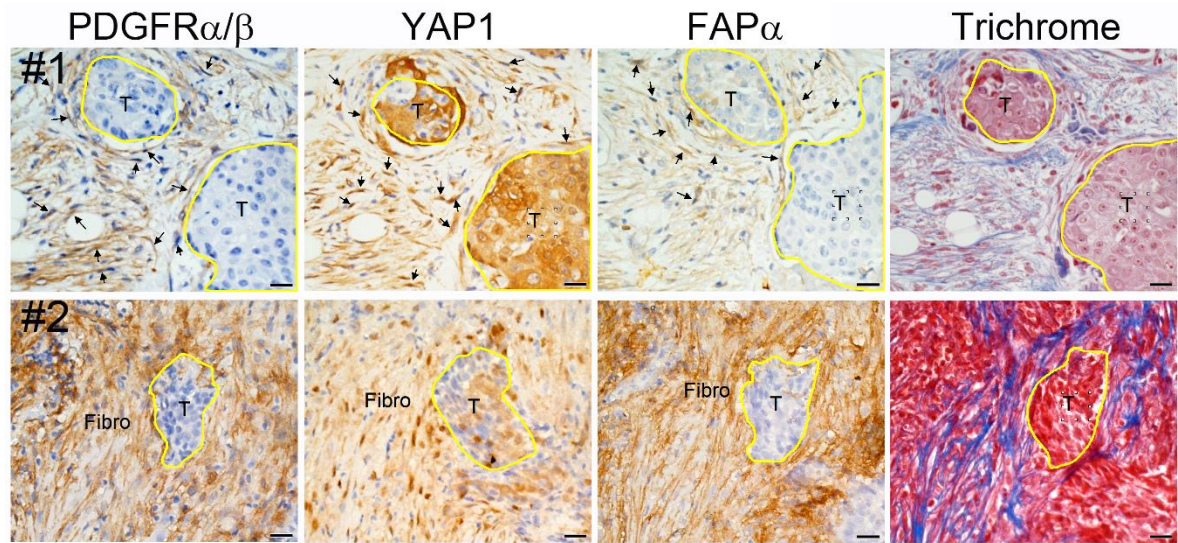

**Supplementary Figure S2.** Representative IHC images of PDGFR $\alpha/\beta$ , YAP1, FAP $\alpha$ ,

and trichrome staining in paraffin-embedded consecutive human NPC tissue sections.

Black arrows signify fibroblast-like cellular structures. Yellow marked zones indicate

selected tumor beds. Fibrosis (blue) within tissue sections was evaluated using

trichrome staining. Scale bar, 20  $\mu\text{m}$ .
