# Supplementary material for: Epstein-Barr viral product-containing exosomes promote fibrosis and nasopharyngeal carcinoma progression through activation of YAP1/FAPα signaling in fibroblasts
Source: PubMed Central journal article supplement (PMC9392321; doi:10.1186/s13046-022-02456-5), 2022-08-20
Supplement: 13046_2022_2456_MOESM6_ESM.pdf [file 13046_2022_2456_MOESM6_ESM.pdf]

**Supplementary Figure S3**

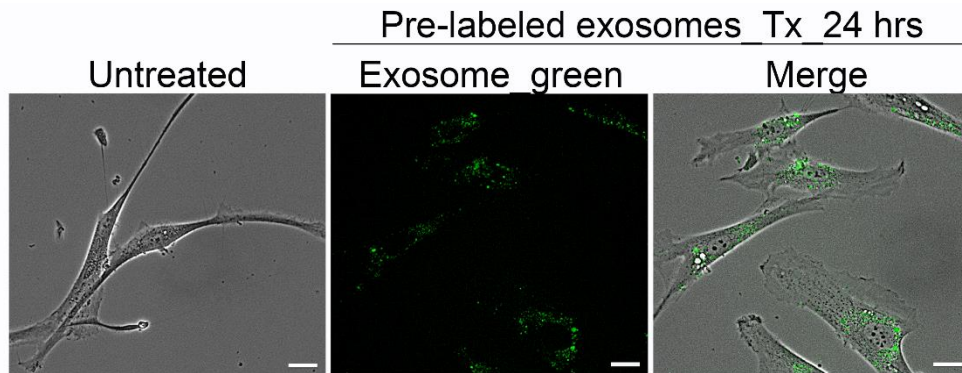

**Supplementary Figure S3.** Uptake of exosomes by primary fibroblasts. Exosomes were pre-labeled with green fluorescent dye and added to cultures of fibroblasts. Images were captured 24 hours post exosome stimulation. Scale bar, 50  $\mu\text{m}$ .
