# Supplementary material for: Epstein-Barr viral product-containing exosomes promote fibrosis and nasopharyngeal carcinoma progression through activation of YAP1/FAPα signaling in fibroblasts
Source: PubMed Central journal article supplement (PMC9392321; doi:10.1186/s13046-022-02456-5), 2022-08-20
Supplement: 13046_2022_2456_MOESM7_ESM.pdf [file 13046_2022_2456_MOESM7_ESM.pdf]

**Supplementary Figure S4**

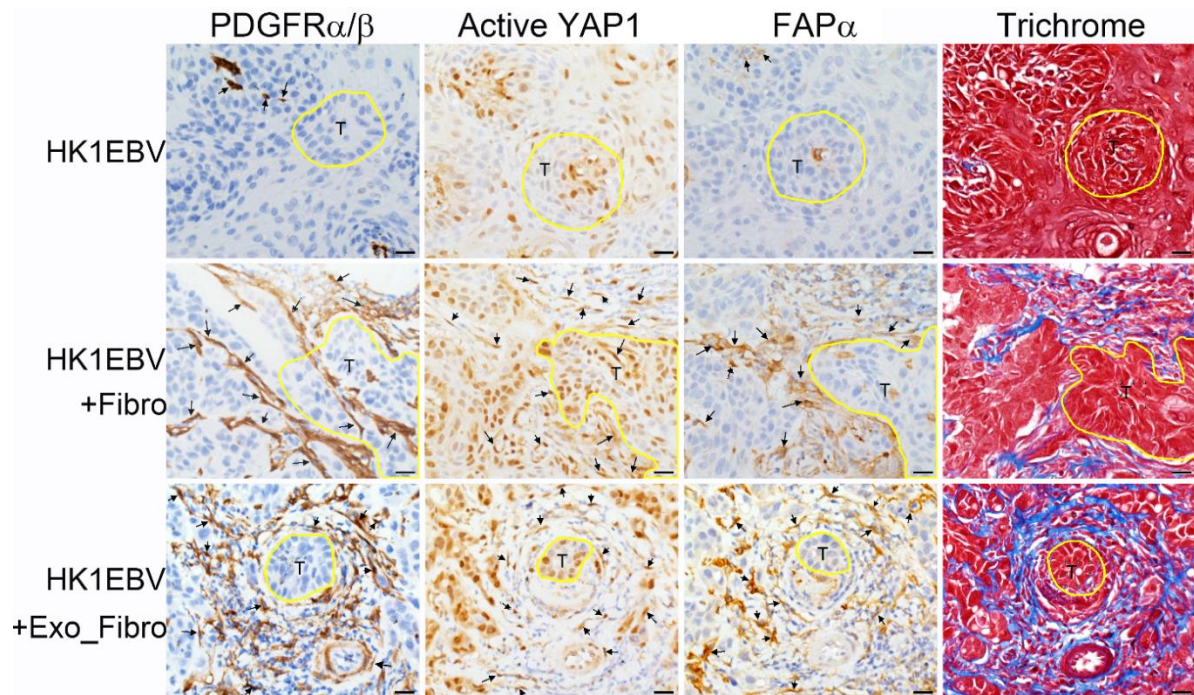

**Supplementary Figure S4.** Representative IHC images of PDGFR $\alpha/\beta$ , active YAP1, FAP $\alpha$ , and trichrome staining in paraffin-embedded consecutive NPC xenografts. Black arrows signify fibroblast-like cellular structures. Yellow marked zones indicate selected tumor beds. Fibrosis (blue) within tumor sections was evaluated using trichrome staining. Scale bar, 20  $\mu$ m.
