# Supplementary material for: Epstein-Barr viral product-containing exosomes promote fibrosis and nasopharyngeal carcinoma progression through activation of YAP1/FAPα signaling in fibroblasts
Source: PubMed Central journal article supplement (PMC9392321; doi:10.1186/s13046-022-02456-5), 2022-08-20
Supplement: 13046_2022_2456_MOESM8_ESM.pdf [file 13046_2022_2456_MOESM8_ESM.pdf]

## Supplementary Figure S5

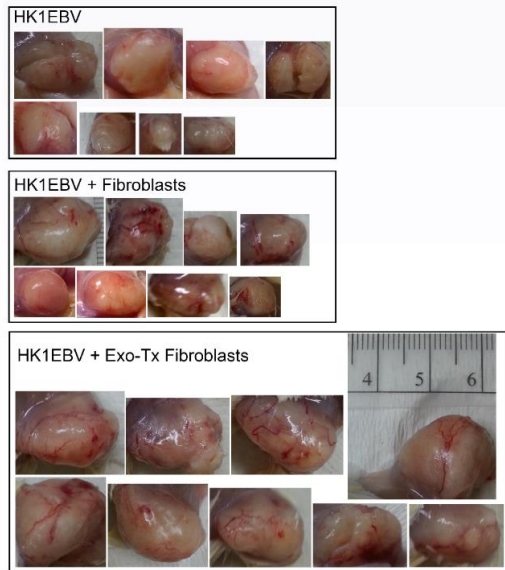

**Supplementary Figure S5.** Images of xenografts dissected from NOD/SCID mice after 7-week subcutaneous injection. HK1EBV cells, HK1EBV cells together with fibroblasts, or HK1EBV cells together with exosome-treated fibroblasts were subcutaneously injected into the legs of mice (n = 8–9 mice/group).
