# Supplementary material for: Epstein-Barr viral product-containing exosomes promote fibrosis and nasopharyngeal carcinoma progression through activation of YAP1/FAPα signaling in fibroblasts
Source: PubMed Central journal article supplement (PMC9392321; doi:10.1186/s13046-022-02456-5), 2022-08-20
Supplement: 13046_2022_2456_MOESM9_ESM.pdf [file 13046_2022_2456_MOESM9_ESM.pdf]

## Supplementary Figure S6

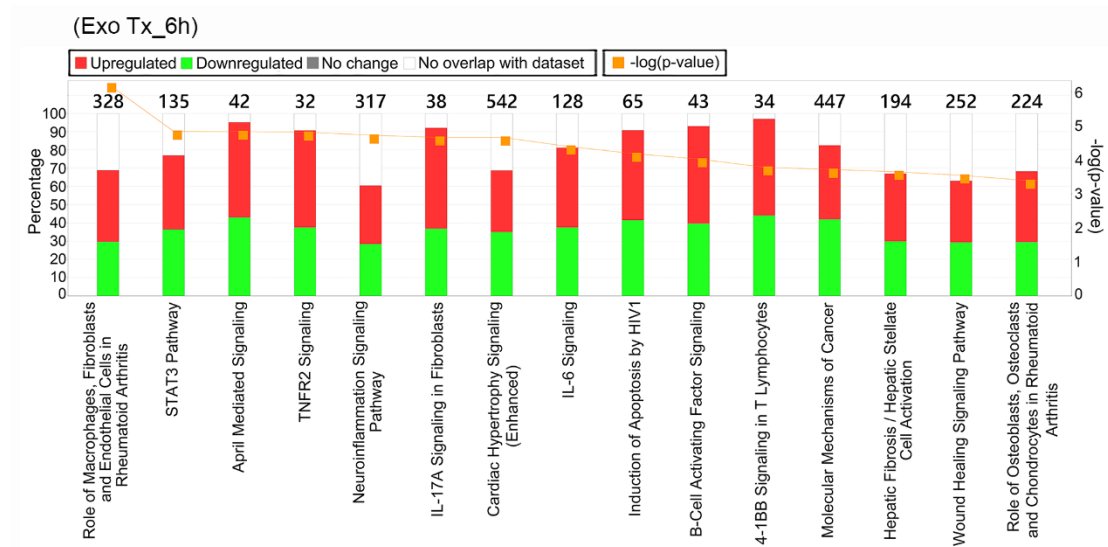

**Supplementary Figure S6.** Deregulated signaling pathways in fibroblasts treated with EBV product-containing exosomes. Analysis of signaling pathways in fibroblasts stimulated with HK1EBV cell-derived exosomes compared with those exposed to medium. The top-scoring signaling pathways were identified using Ingenuity Pathway Analysis (IPA) software (QIAGEN). The identified pathways were ranked by significance [ $-\log(p\text{-value})$ ]. The number of genes that met cutoff criteria [ $|\log_2(\text{FC})| > 0.5$  and  $p\text{ value} < 0.05$ ] in a given signaling pathway was shown. Total RNAs were harvested 6 hours post HK1EBV cell-derived exosome (10  $\mu\text{g/ml}$ ) stimulation.
