# Supplementary material for: Epstein-Barr viral product-containing exosomes promote fibrosis and nasopharyngeal carcinoma progression through activation of YAP1/FAPα signaling in fibroblasts
Source: PubMed Central journal article supplement (PMC9392321; doi:10.1186/s13046-022-02456-5), 2022-08-20
Supplement: 13046_2022_2456_MOESM10_ESM.pdf [file 13046_2022_2456_MOESM10_ESM.pdf]

## Supplementary Figure S7

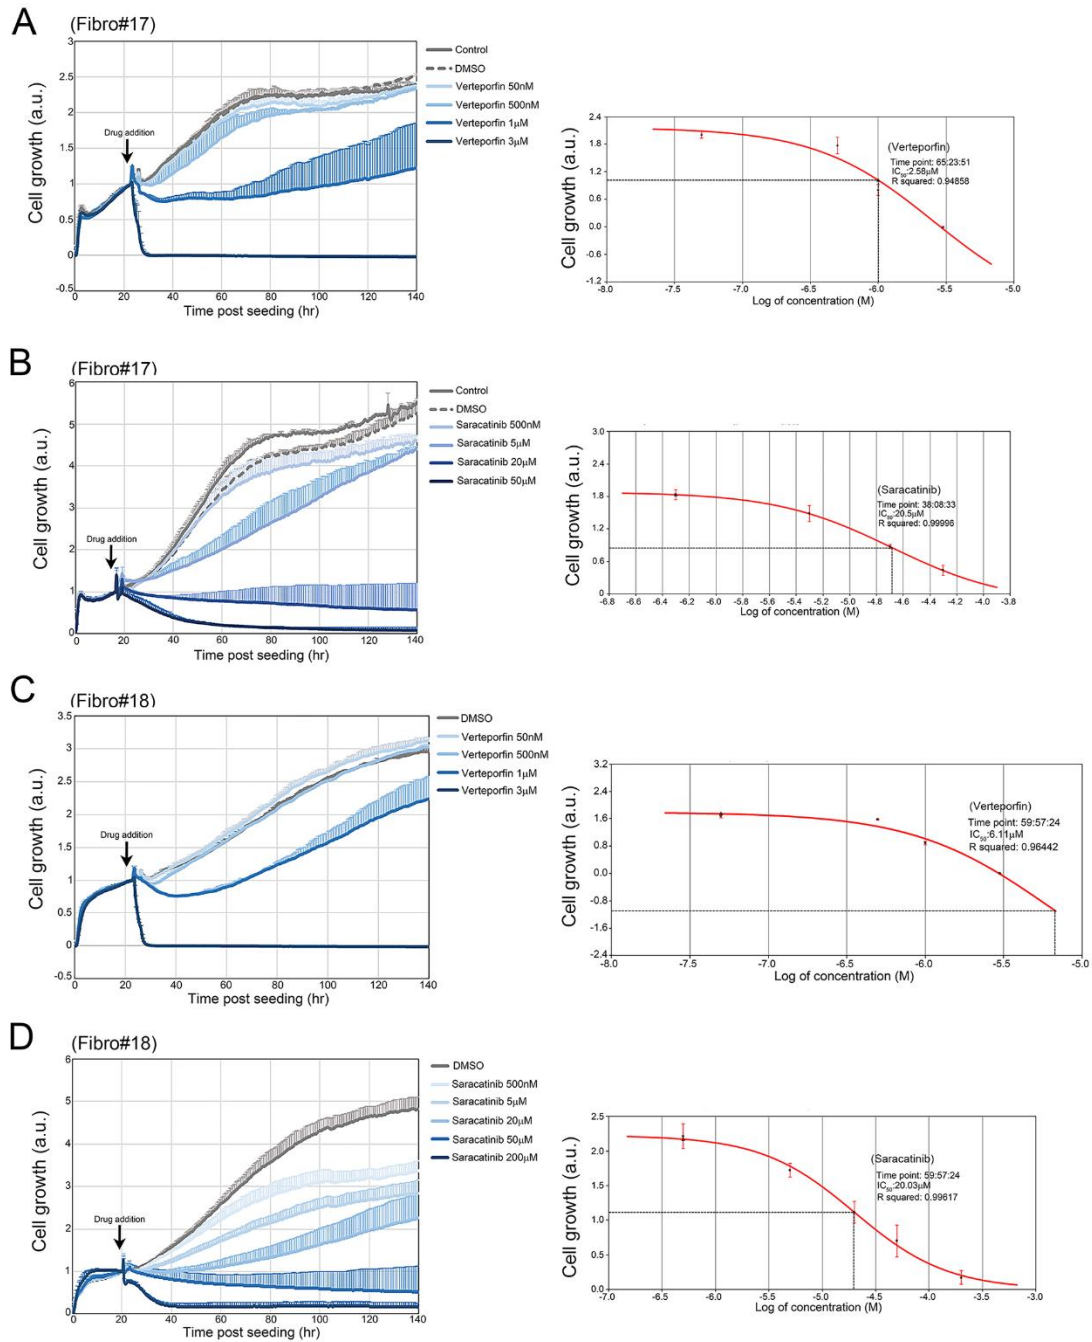

**Supplementary Figure S7.** Cytotoxicity assessments of different doses of verteporfin or saracatinib in primary fibroblasts. **A–B** Real-time measurement of cell survival in response to various doses of verteporfin (**A**) or saracatinib (**B**) treatment in Fibro#17 cells. **C–D** Measurement of cell survival in response to various doses of verteporfin (**C**)

or saracatinib (**D**) treatment in Fibro#18 cells. Data are presented as means and SD of quadruplicate experiments (left panels). The drug-induced cell toxicity was determined by calculating the  $IC_{50}$  after treatment (right panels). Normalized cell growth was displayed against the logarithm of concentration. The values of  $IC_{50}$  were calculated using the RTCA software (ACEA Biosciences).
