# Supplementary material for: Epstein-Barr viral product-containing exosomes promote fibrosis and nasopharyngeal carcinoma progression through activation of YAP1/FAPα signaling in fibroblasts
Source: PubMed Central journal article supplement (PMC9392321; doi:10.1186/s13046-022-02456-5), 2022-08-20
Supplement: 13046_2022_2456_MOESM11_ESM.pdf [file 13046_2022_2456_MOESM11_ESM.pdf]

## Supplementary Figure S8

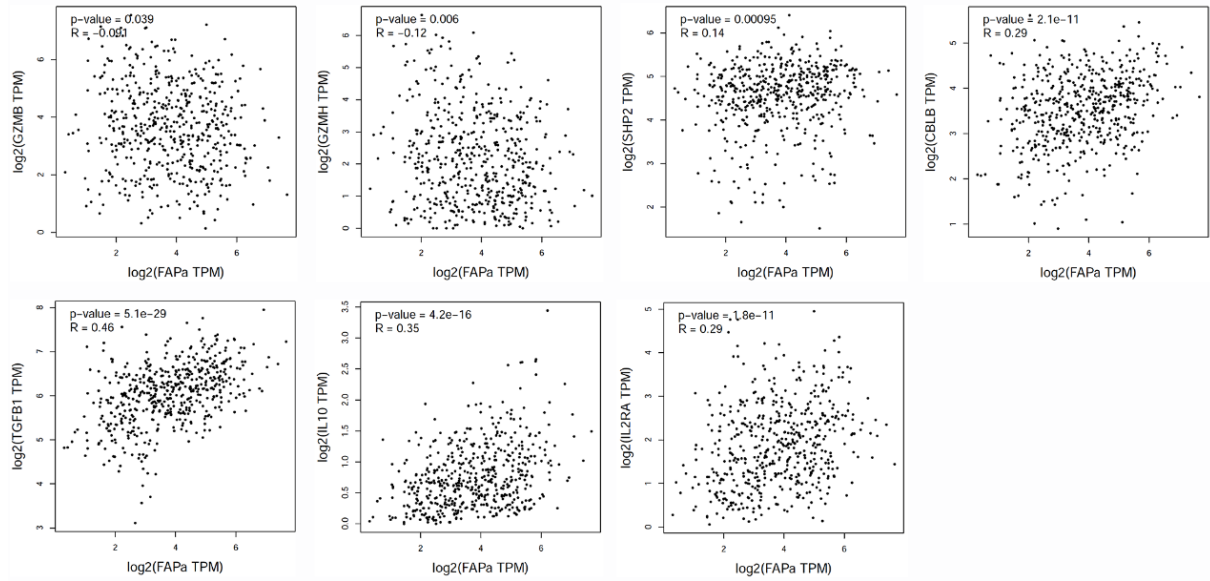

**Supplementary Figure S8.** Correlation analysis between expression of FAP $\alpha$  and immune regulatory molecules. Expression data were extracted from the *TCGA head and neck squamous cell carcinoma RNA sequencing dataset*. Spearman's correlation test was used to calculate the correlation between mRNA expressions of two select genes.
